# Supplementary material for: Environmentally benign synthesis of vinyl ester resin from biowaste glycerin
Source: Royal Society of Chemistry journal article supplement (doi:10.1039/c5ra03254g), 2015-01-01
Supplement: c5ra03254g1.pdf [file c5ra03254g1.pdf]

## **Supporting Information**

### **Environmentally Benign Synthesis of Vinyl Ester Resin from Biowaste Glycerin**

Priyank N. Shah,<sup>\*,†</sup> Namjoon Kim,<sup>‡</sup> Zhuangrong Huang,<sup>‡</sup> Mahesh Jayamanna,<sup>†</sup> Akshay Kokil,<sup>†</sup>  
Alex Pine,<sup>⊥</sup> Jarvin Kaltsas,<sup>⊥</sup> Edwin Jahngen,<sup>†</sup> David K. Ryan,<sup>†</sup> Seongkyu Yoon,<sup>‡</sup> Robert F.  
Kovar<sup>§§</sup> and Yongwoo Lee<sup>\*,†</sup>

<sup>†</sup>*Department of Chemistry, University of Massachusetts Lowell, One University Avenue, Lowell,  
Massachusetts 01854, United States*

<sup>⊥</sup>*Maine Standard Biofuels, 51 Ingersoll Dr. Portland, Maine 04103, United States*

<sup>‡</sup>*Department of Chemical Engineering, University of Massachusetts Lowell, One University  
Avenue, Lowell, Massachusetts 01854, United States*

<sup>§§</sup>*R.F. Kovar & Associates, 203 Beach Street, Wrentham, MA 02093-1513*

\* Corresponding Authors: e-mail:

Priyank N. Shah; email- [Priyank\\_shah@uml.edu](mailto: Priyank_shah@uml.edu); Phone No- 978-934-3734

Yongwoo Lee; email- [Yongwoo\\_Lee@uml.edu](mailto: Yongwoo_Lee@uml.edu), Phone No- 978-934-3792

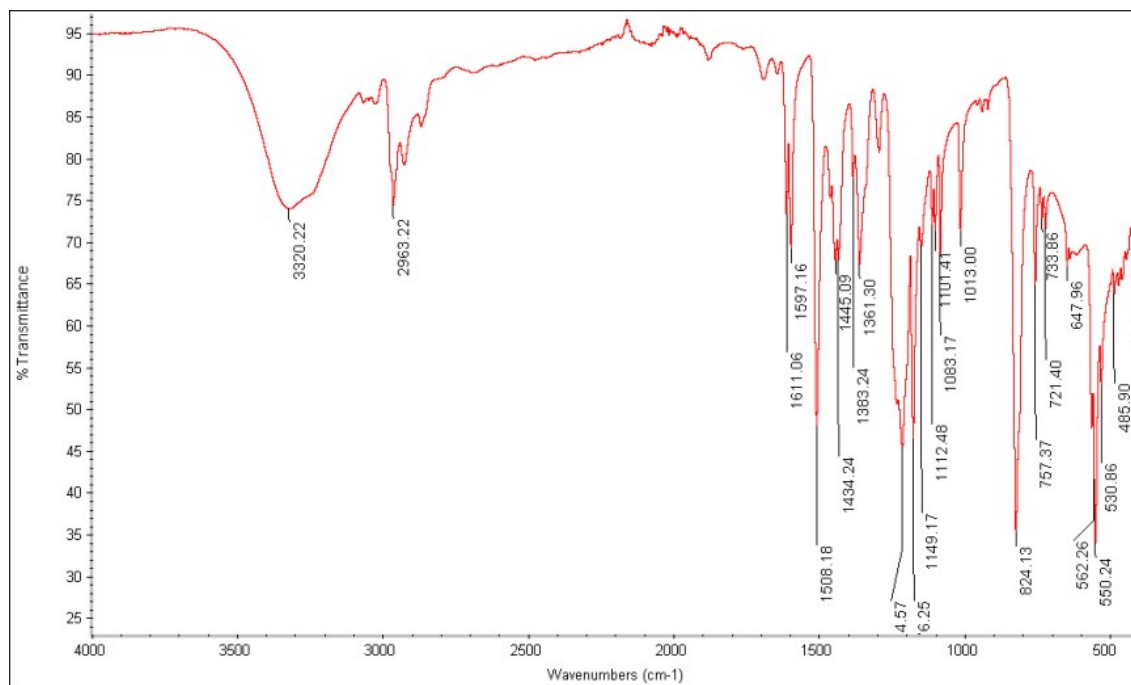

Figure S1: FT-IR of column separated Bisphenol A (BPA).

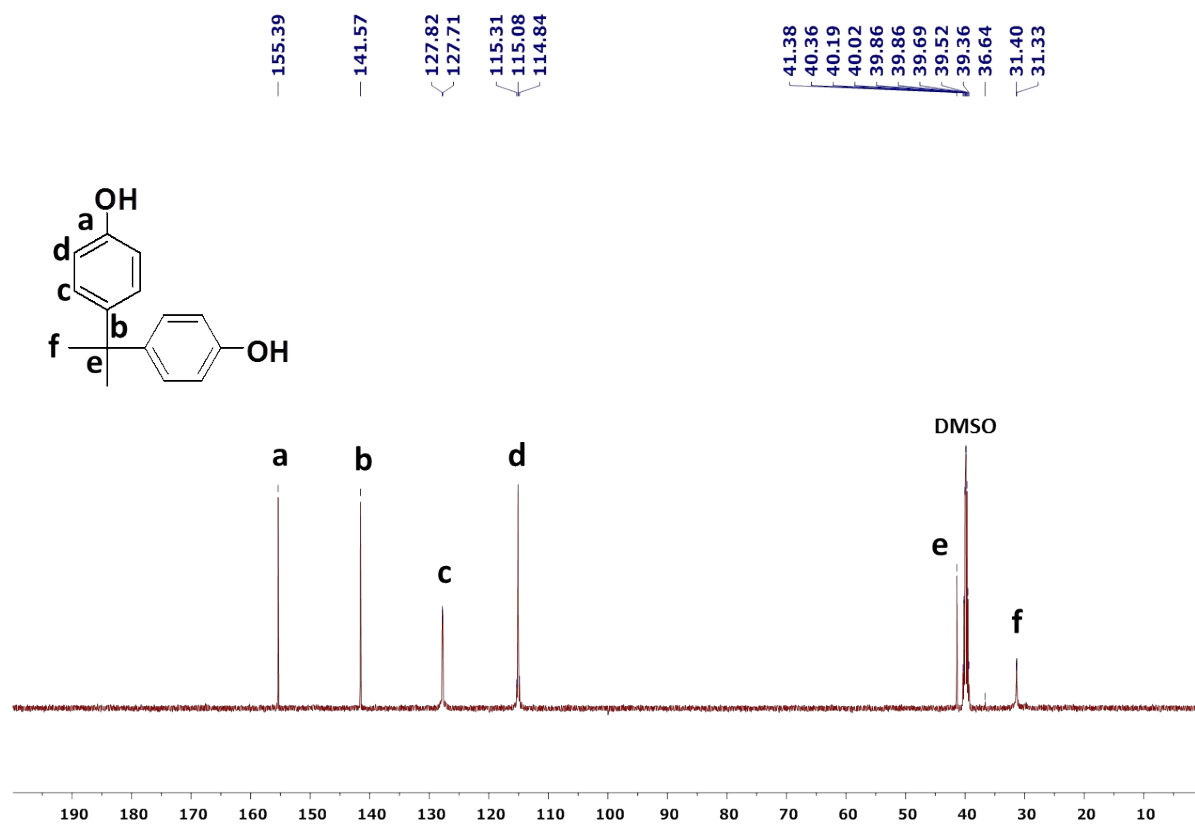

Figure S2: <sup>13</sup>C NMR of column separated BPA.

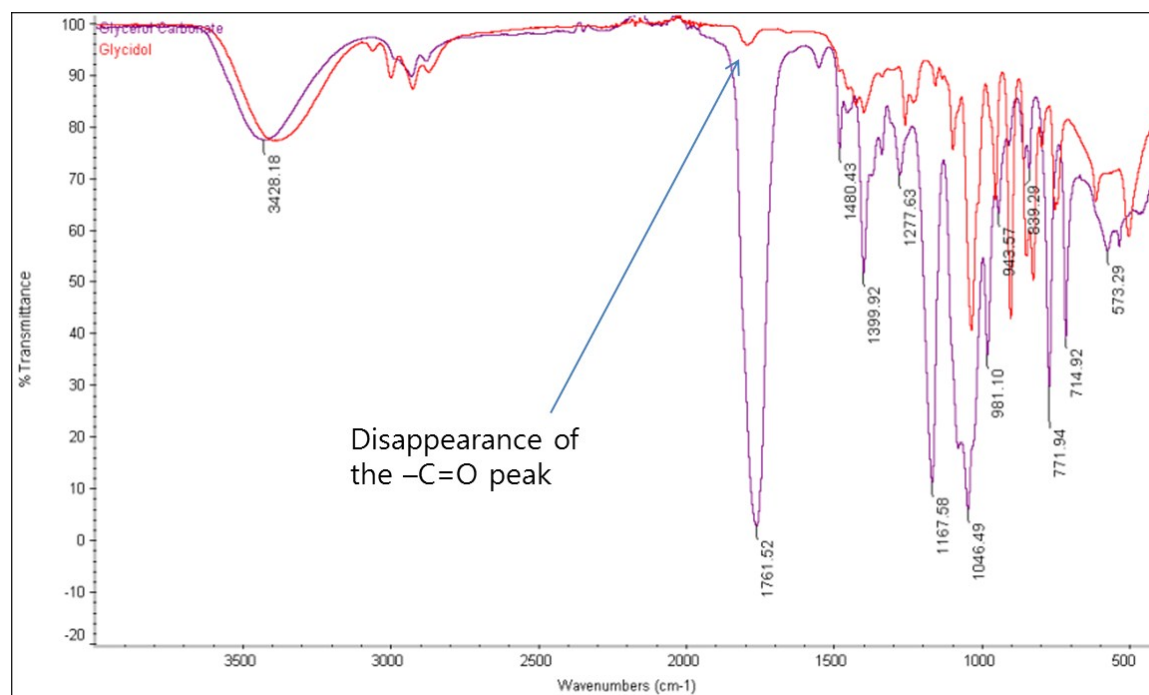

Figure S3: FTIR of glycerol carbonate and glycidol. (Purple: Glycerol Carbonate, Red: Glycerin)

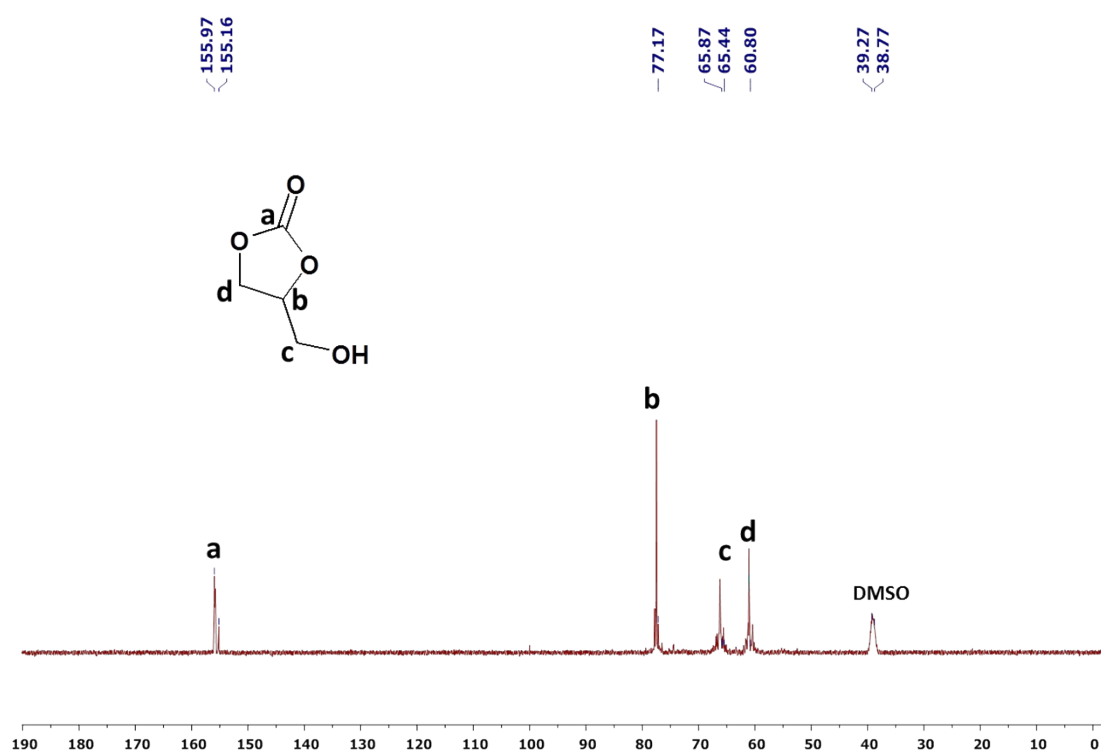

Figure S4:  $^{13}C$  NMR of glycerol carbonate.

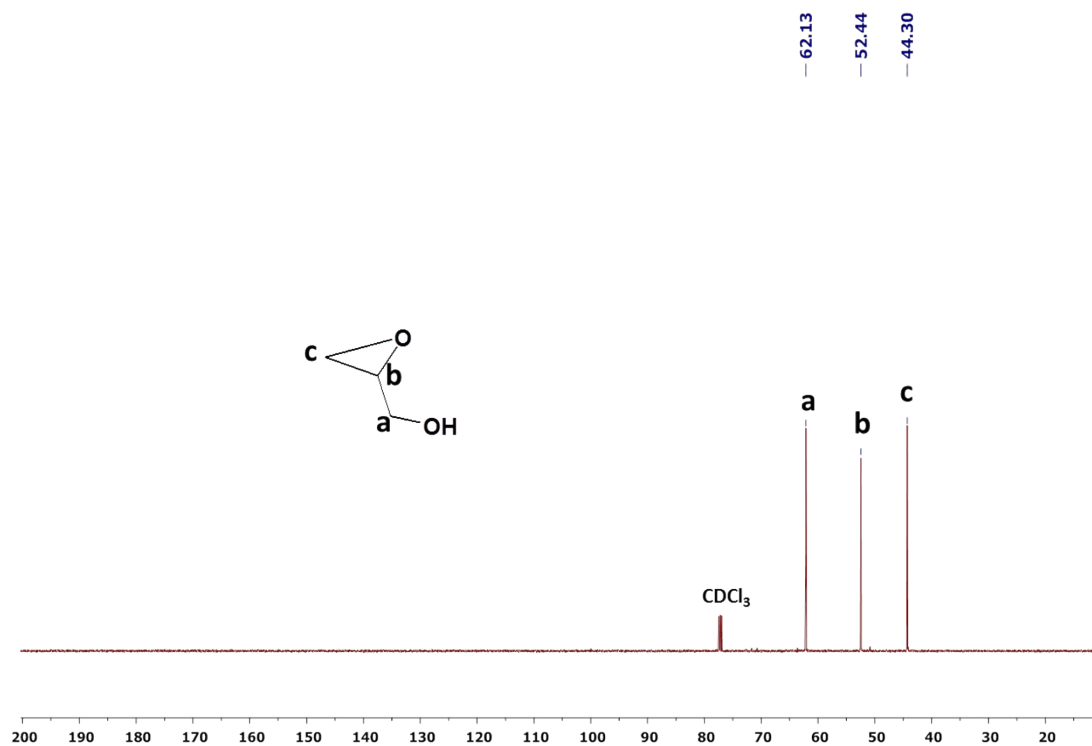

Figure S5:  $^{13}\text{C}$  NMR of glycidol.

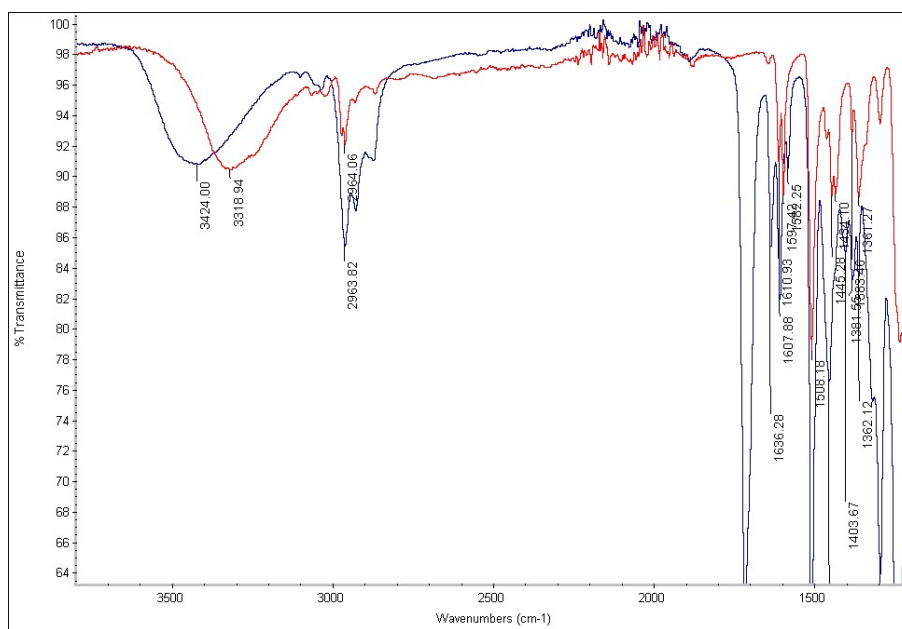

Figure S6: FT-IR and image of vinyl ester monomer synthesized using bisphenol A. (Blue: Vinyl Ester Resin, Red: Bisphenol A)

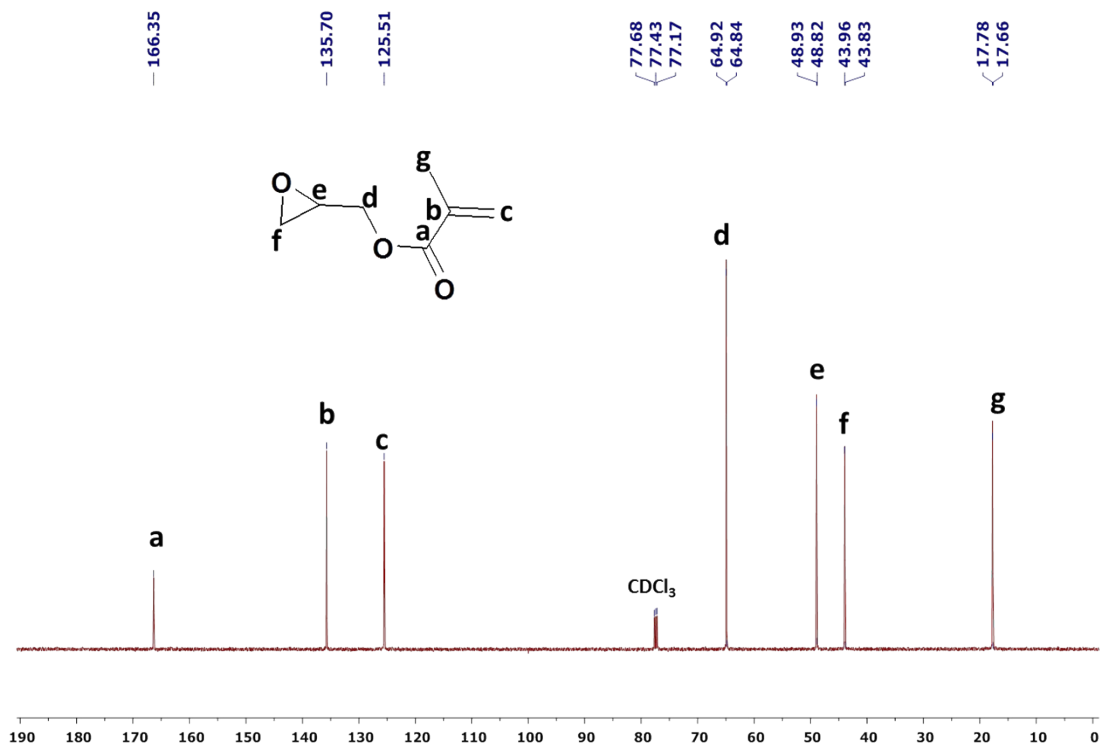

Figure S7: <sup>13</sup>C NMR of Glycidyl Methacrylate.

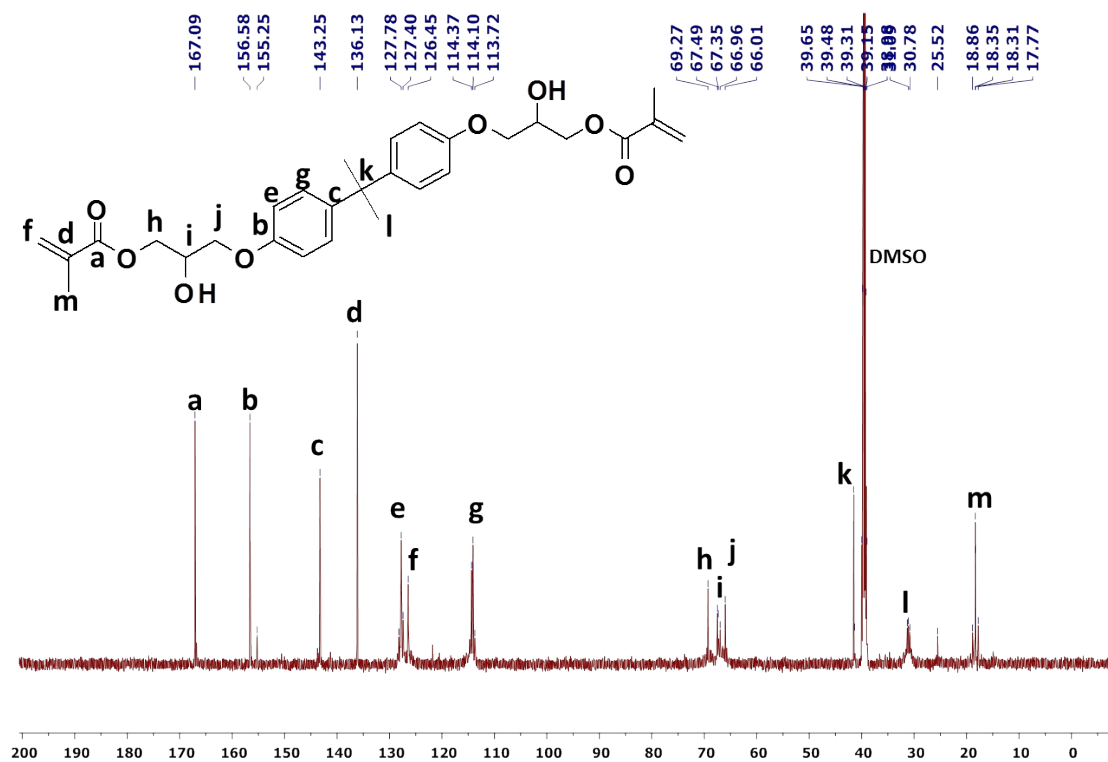

Figure S8: <sup>13</sup>C NMR of Vinyl Ester Resin.

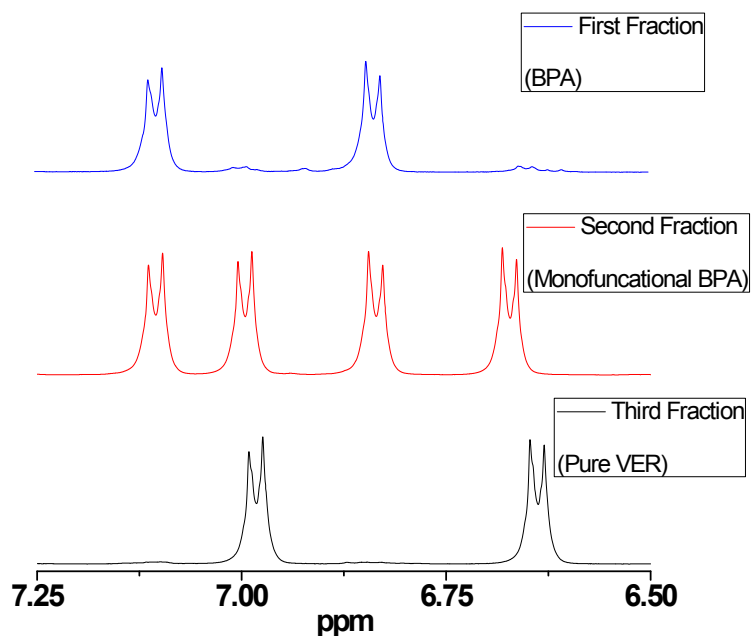

**Figure S9: Enlarged  $^1\text{H}$  NMR of Vinyl Ester Resin between 7.25-6.50 ppm.**

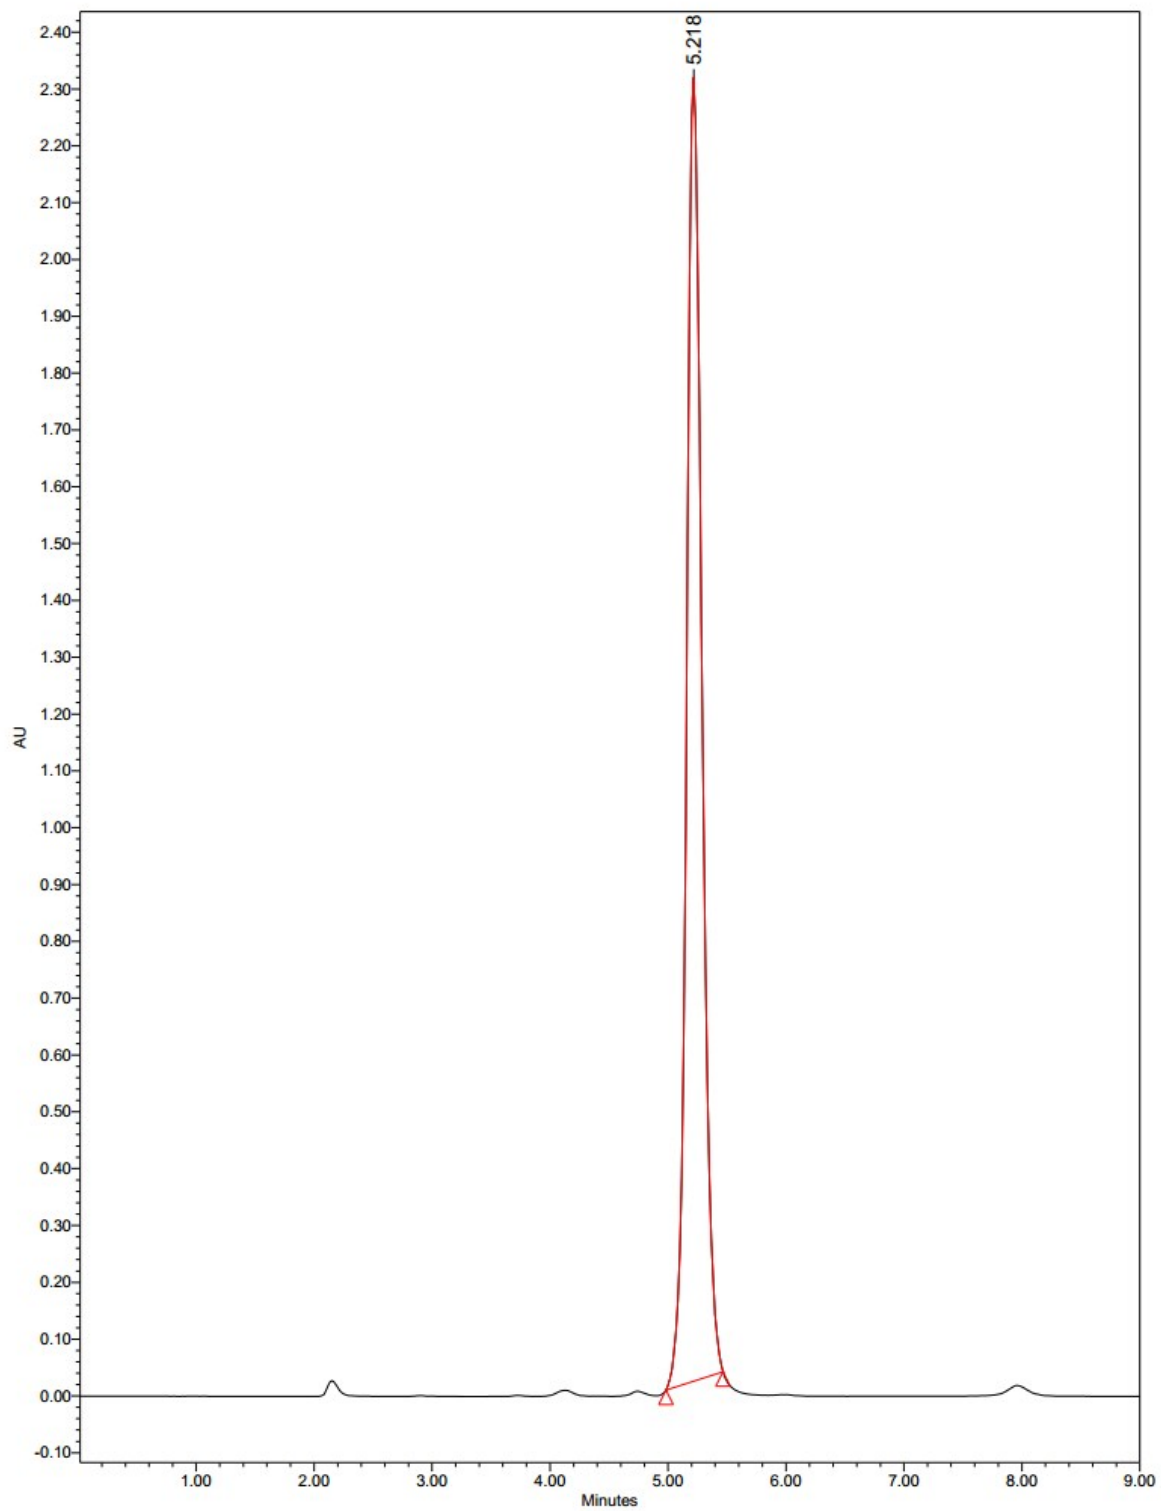

**Figure S10. Chromatogram of a first fraction isolated during column purification of the VER-monomer.**

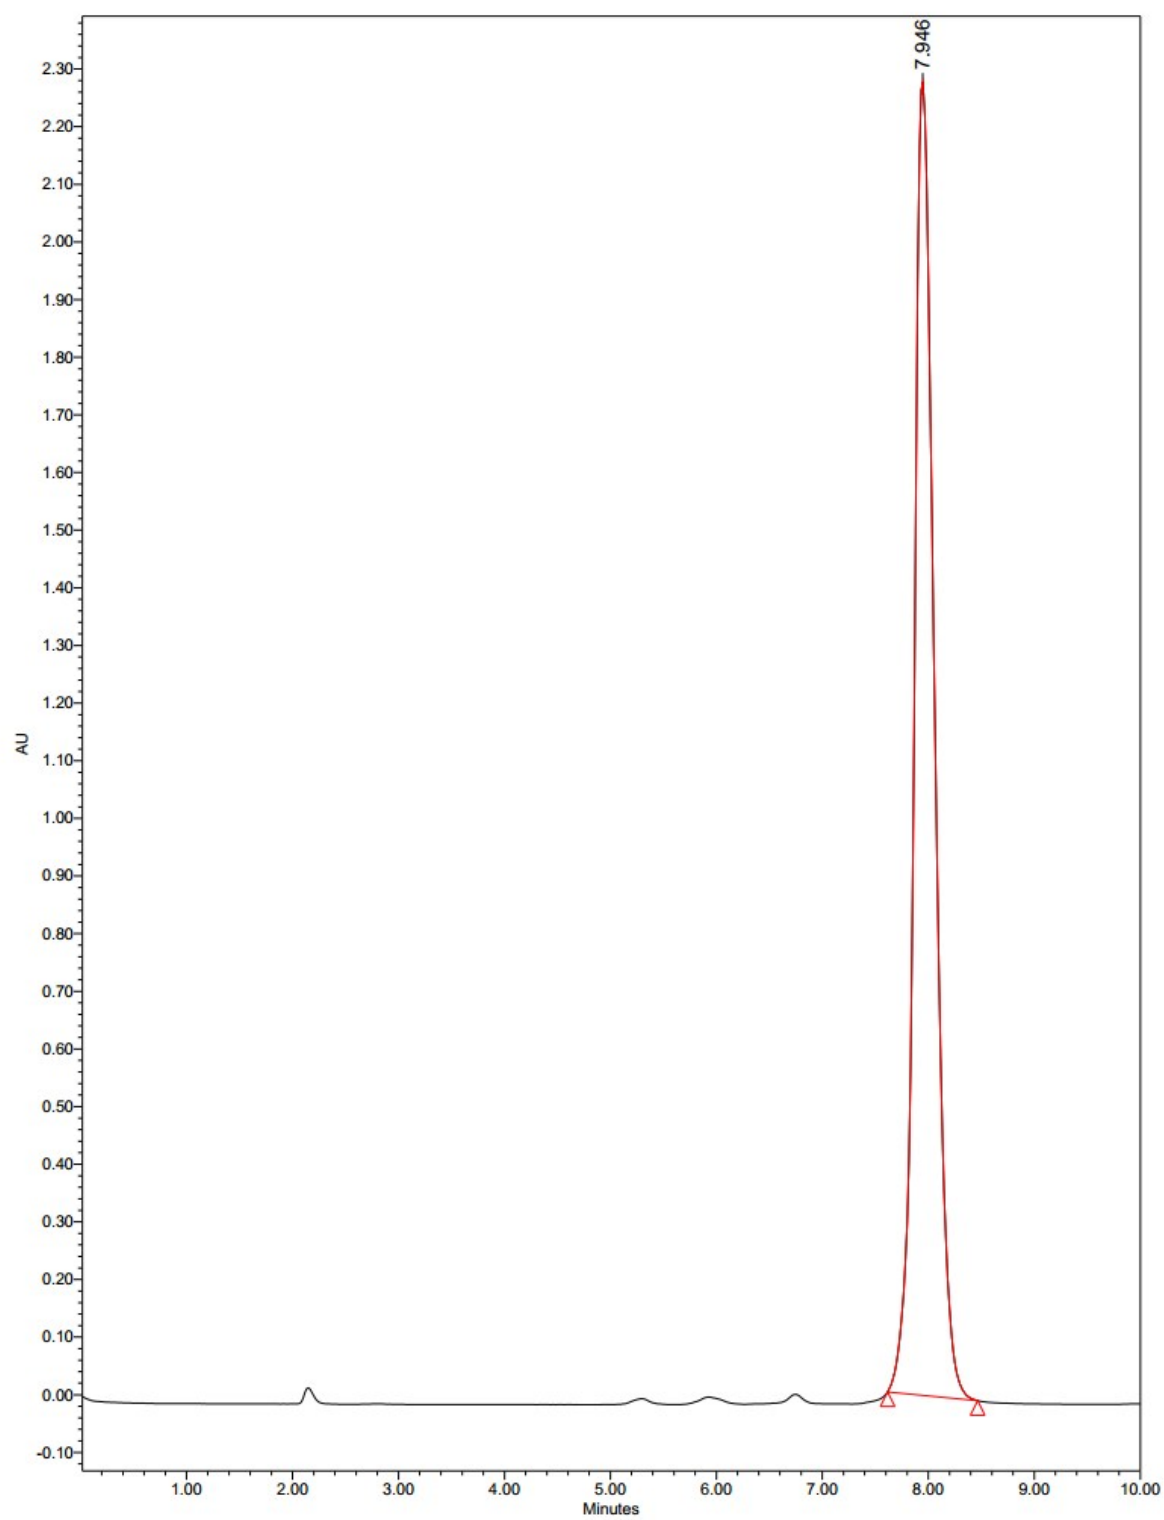

**Figure S11. Chromatogram of a second fraction isolated during column purification of the VER-monomer.**



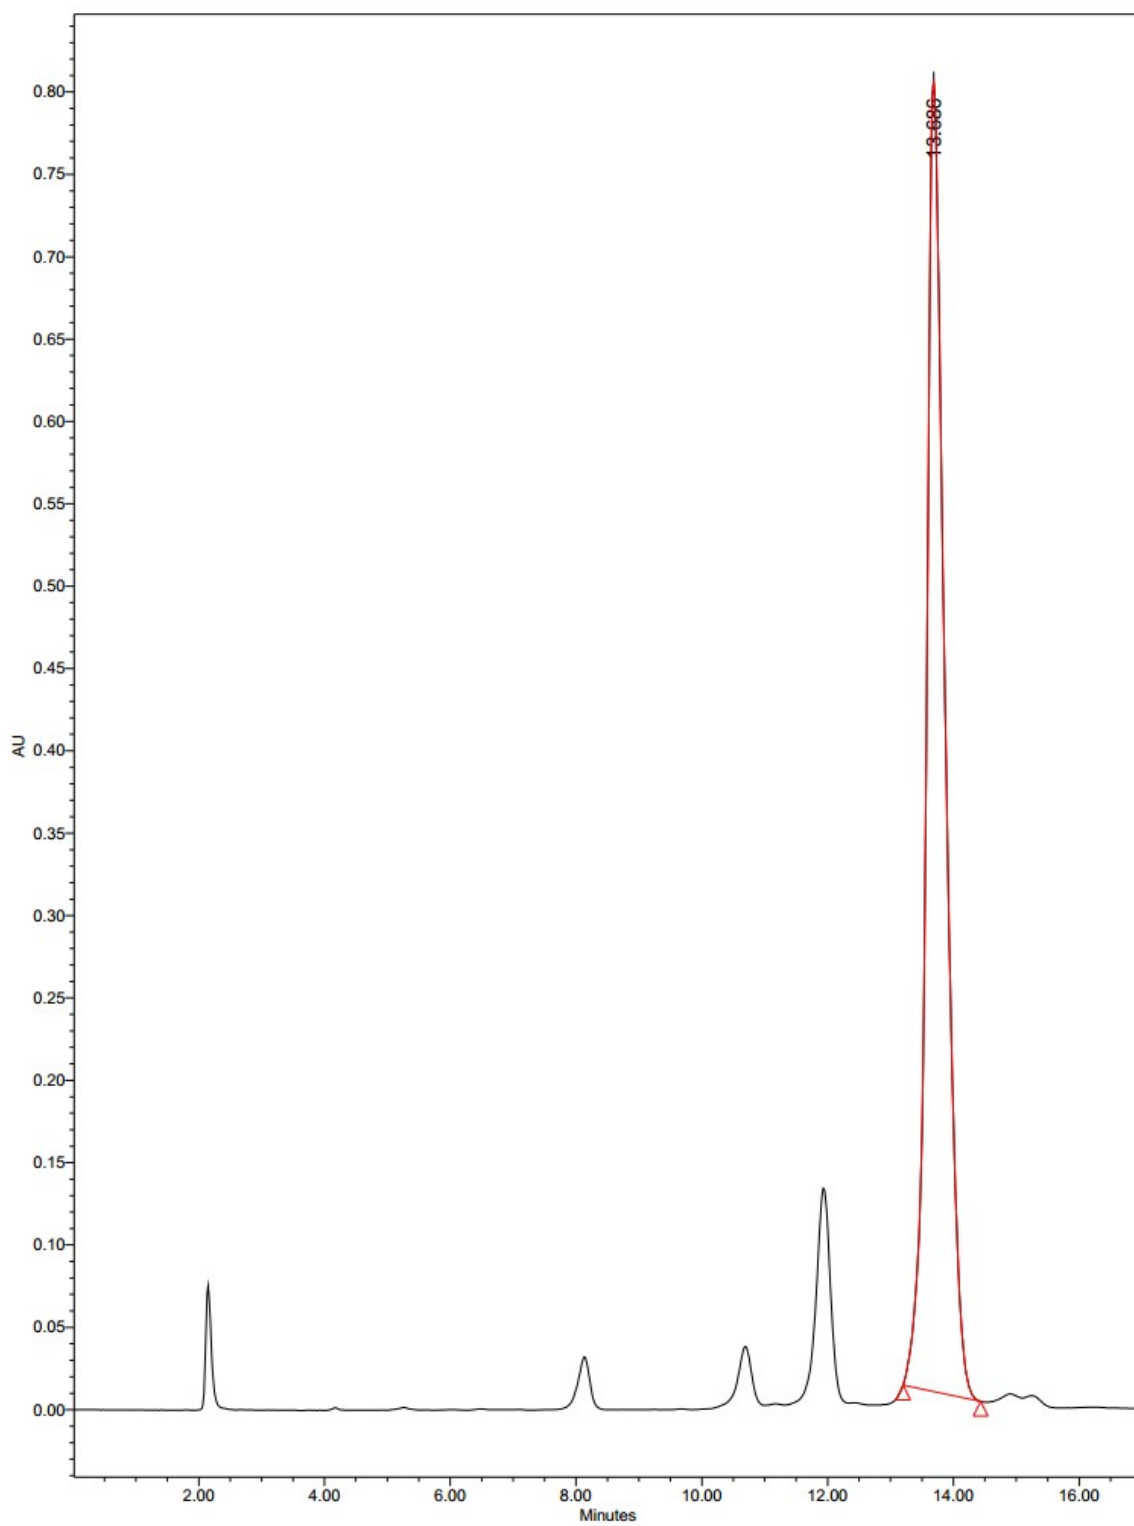

**Figure S12. Chromatogram of a third fraction isolated during column purification of the VER-monomer.**
